# Supplementary material
Source: Springer Nature journal article supplement (https://www.springermedizin.de/resource/supplementary/12884_2011_482_MOESM3_ESM.pdf/9457914)

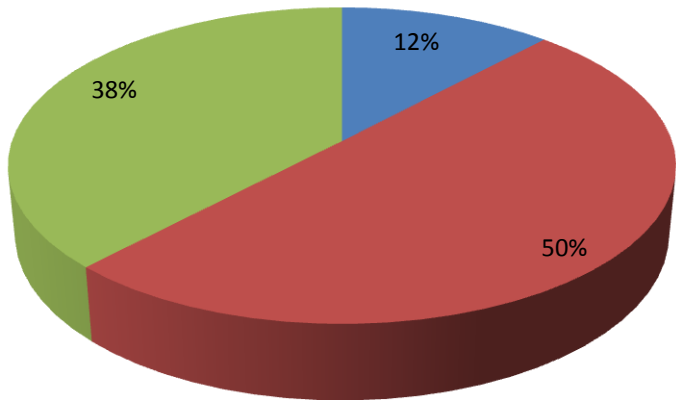

- Low (0 - 59)
- Average (60 - 79)
- High (80 - 100)

Supplement: MOESM3 [file 9457914]
